# Supplementary material
Source: Springer Nature journal article supplement (https://www.springermedizin.de/resource/supplementary/12871_2012_149_MOESM1_ESM.pdf/9428938)
Supplement: MOESM1 [file 9428938]

**Antibiotic drugs****ASAP ECMO Study**

Patient No.

*Instructions: When two or more antibiotics of interest are prescribed for one patient, sample according to the antibiotic with the longer dosing interval. NB: 0 = pre commencement of infusion, 15 etc= 15mins post completion of infusion.*

| Study drug/s and dosage | 6 hourly dosing schedule <input type="checkbox"/> |              |              | 8 hours or longer dosing schedule <input type="checkbox"/> |              |              |
|-------------------------|---------------------------------------------------|--------------|--------------|------------------------------------------------------------|--------------|--------------|
|                         | 0                                                 | 15           | 30           | 0                                                          | 15           | 30           |
| Drug:                   | Actual Time:                                      | Actual Time: | Actual Time: | Actual Time:                                               | Actual Time: | Actual Time: |
| Dosage:                 | __ : __                                           | __ : __      | __ : __      | __ : __                                                    | __ : __      | __ : __      |
| Time of dosing (exact): |                                                   |              |              |                                                            |              |              |
|                         | 45                                                | 60           | 90           | 45                                                         | 60           | 90           |
| Drug:                   | Actual Time:                                      | Actual Time: | Actual Time: | Actual Time:                                               | Actual Time: | Actual Time: |
| Dosage:                 | __ : __                                           | __ : __      | __ : __      | __ : __                                                    | __ : __      | __ : __      |
| Time of dosing (exact): |                                                   |              |              |                                                            |              |              |
|                         | 120                                               | 180          | 360          | 120                                                        | 180          | 360          |
| Drug:                   | Actual Time:                                      | Actual Time: | Actual Time: | Actual Time:                                               | Actual Time: | Actual Time: |
| Dosage:                 | __ : __                                           | __ : __      | __ : __      | __ : __                                                    | __ : __      | __ : __      |
| Time of dosing (exact): |                                                   |              |              |                                                            |              |              |
